# Supplementary material for: Ultrasound-Triggered Release of 5-Fluorouracil from Soy Lecithin Echogenic Liposomes
Source: MDPI journal article supplement (doi:10.3390/pharmaceutics13060821), 2021-06-01
Supplement: s1 [file s1]

# Supplementary Materials: Ultrasound-Triggered Release of 5-fluorouracil from Soy Lecithin Echogenic Liposomes

Charles Izuchukwu Ezekiel, Alain Murhimalika Bapolisi, Roderick Bryan Walker and Rui Werner Maçedo Krause

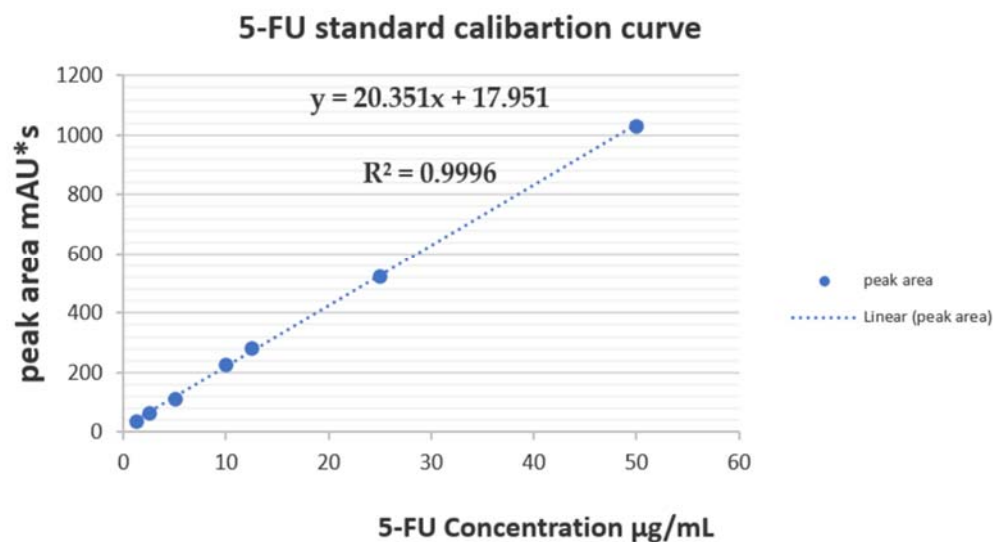

Figure 1. 5-Fluorouracil (5-FU) standard plot under the concentration range of 1.25-50  $\mu\text{g/mL}$ .

Table 1. Standard deviation and recovery values for the 5 days analysis.

| Concentration ( $\mu\text{g/mL}$ ) | Intraday precision (%RSD) | Interday precision (%RSD) | Accuracy (% Recovery) |
|------------------------------------|---------------------------|---------------------------|-----------------------|
| 1.25                               | 1.28                      | 0.98                      | 96.22                 |
| 2.5                                | 1.33                      | 1.63                      | 94.51                 |
| 5                                  | 0.84                      | 1.62                      | 96.29                 |
| 10                                 | 0.52                      | 3.22                      | 104.36                |
| 12.5                               | 1.25                      | 1.15                      | 104.98                |
| 25                                 | 1.22                      | 1.04                      | 99.52                 |
| 50                                 | 1.21                      | 0.94                      | 99.14                 |
